# Supplementary material
Source: MDPI journal article supplement (https://www.mdpi.com/1999-4907/13/1/116)
Supplement: s1 [file s1]

## Supplemental Materials

**Table S1** The result of zero-inflated generalized linear mixed model of number of recruits per 50 x 50 m quadrat and fire intensity from 89 species in 50-ha Huai Kha Khaeng Forest Dynamics Plot, Thailand.

| Species code | Species                          | Family                  | Intercept | Slope   | Response    |
|--------------|----------------------------------|-------------------------|-----------|---------|-------------|
| AGLASP       | <i>Aglaia spectabilis</i>        | Meliaceae               | 1.5162    | -4.4267 | negative    |
| CINNTA       | <i>Cinnamomum tavoyanum</i>      | Lauraceae               | -0.1032   | -3.6439 | negative    |
| BACCRA       | <i>Baccaurea ramiflora</i>       | Phyllanthaceae          | 1.5769    | -3.4043 | negative    |
| DIPTAL       | <i>Dipterocarpus alatus</i>      | Dipterocarpaceae        | 1.8188    | -3.3911 | negative    |
| VATIHA       | <i>Vatica harmandiana</i>        | Dipterocarpaceae        | 3.3178    | -3.1943 | negative    |
| ACEROB       | <i>Acer oblongum</i>             | Sapindaceae             | 1.9070    | -3.1691 | negative    |
| SYZYSY       | <i>Syzygium syzygioides</i>      | Myrtaceae               | -0.3877   | -3.0483 | negative    |
| MISCPE       | <i>Mischocarpus pentapetalus</i> | Sapindaceae             | 1.5048    | -3.0295 | negative    |
| XANTFL       | <i>Xanthophyllum flavescens</i>  | Polygalaceae            | 0.3160    | -2.9635 | negative    |
| BEILGA       | <i>Beilschmiedia gammieana</i>   | Lauraceae               | 0.1809    | -2.8680 | negative    |
| SACCLI       | <i>Saccopetalum lineatum</i>     | Annonaceae              | 1.4618    | -2.5607 | negative    |
| DYSOGR       | <i>Dysoxylum grande</i>          | Meliaceae               | 0.7693    | -2.5117 | negative    |
| CYATMA       | <i>Cyathocalyx martabanicus</i>  | Annonaceae              | -1.7923   | -2.3783 | negative    |
| PRUNAR       | <i>Prunus arborea</i>            | Rosaceae                | -1.6808   | -2.2705 | no response |
| MEMEOV       | <i>Memecylon ovatum</i>          | Melastomataceae         | 1.0551    | -2.2115 | negative    |
| ANTIMO       | <i>Antidesma montanum</i>        | Phyllanthaceae          | -1.9787   | -2.2104 | no response |
| HARPCU       | <i>Harpullia cupanioides</i>     | Sapindaceae             | -1.9867   | -2.1506 | no response |
| PHOEPA       | <i>Phoebe paniculata</i>         | Lauraceae               | 1.5045    | -2.0669 | negative    |
| DALBOL       | <i>Dalbergia oliveri</i>         | Fabaceae-papilionoideae | -0.6922   | -2.0073 | no response |
| MITRTH       | <i>Mitrephora thorelii</i>       | Annonaceae              | 0.7562    | -2.0014 | negative    |
| NEOLOB       | <i>Neolitsea obtusifolia</i>     | Lauraceae               | 2.3714    | -1.9781 | negative    |
| DIOSWI       | <i>Diospyros winitii</i>         | Ebenaceae               | 1.4908    | -1.9437 | negative    |
| MEMEPL       | <i>Memecylon plebejum</i>        | Melastomataceae         | 1.2532    | -1.9243 | negative    |
| OROPPO       | <i>Orophea polycarpa</i>         | Annonaceae              | 3.5951    | -1.8992 | negative    |
| PRISTE       | <i>Prismatomeris tetrandra</i>   | Rubiaceae               | 3.0687    | -1.8532 | negative    |
| GARCSP       | <i>Garcinia speciosa</i>         | Clusiaceae              | -2.0495   | -1.8331 | no response |
| ARYTLI       | <i>Arytera littoralis</i>        | Sapindaceae             | 1.8372    | -1.7989 | negative    |
| ANISCO       | <i>Anisoptera costata</i>        | Dipterocarpaceae        | -1.2861   | -1.7927 | no response |
| MALLPH       | <i>Mallotus philippensis</i>     | Euphorbiaceae           | 2.1994    | -1.7750 | negative    |
| DIOSFE       | <i>Diospyros ferrea</i>          | Ebenaceae               | 0.5329    | -1.7492 | negative    |
| DIMOLO       | <i>Dimocarpus longan</i>         | Sapindaceae             | 2.9542    | -1.7336 | negative    |
| GLUTOB       | <i>Gluta obovata</i>             | Anacardiaceae           | 1.0571    | -1.7282 | negative    |
| FAGEFA       | <i>Fagerlindia faciculata</i>    | Rubiaceae               | 3.1115    | -1.7133 | negative    |
| ARTOGO       | <i>Artocarpus gomezianus</i>     | Moraceae                | -1.4908   | -1.6528 | negative    |
| AGLAOD       | <i>Aglaia odorata</i>            | Meliaceae               | 2.8547    | -1.4675 | negative    |
| LAGEVI       | <i>Lagerstroemia villosa</i>     | Lythraceae              | -1.6349   | -1.4501 | no response |
| ARDIPO       | <i>Ardisia polycephala</i>       | Myrsinaceae             | 2.6257    | -1.4362 | negative    |
| SYZYCU       | <i>Syzygium cumini</i>           | Myrtaceae               | 0.4149    | -1.4266 | negative    |

Table S1 (cont.)

| Species code | Species                          | Family                    | Intercept | Slope   | Response    |
|--------------|----------------------------------|---------------------------|-----------|---------|-------------|
| PERSXX       | <i>Persea sp.</i>                | Lauraceae                 | 0.6114    | -1.4194 | negative    |
| CHAMMA       | <i>Champereia manillana</i>      | Opiliaceae                | -2.1506   | -1.4162 | negative    |
| MANGQU       | <i>Mangifera quadrifida</i>      | Anacardiaceae             | 0.2426    | -1.3817 | negative    |
| LEPIRU       | <i>Lepisanthes rubiginosa</i>    | Sapindaceae               | 1.0454    | -1.3809 | negative    |
| HOPEOD       | <i>Hopea odorata</i>             | Dipterocarpaceae          | 0.1015    | -1.3199 | negative    |
| ALPHVE       | <i>Alphonsea ventricosa</i>      | Annonaceae                | 2.2660    | -1.3160 | negative    |
| SCLEWA       | <i>Scleropyrum wallichianum</i>  | Santalaceae               | -3.2016   | -1.2502 | no response |
| CHUKTA       | <i>Chukrasia tabularis</i>       | Meliaceae                 | -0.8826   | -1.2486 | negative    |
| XYLOLO       | <i>Xylosma longifolium</i>       | Salicaceae                | -0.8416   | -1.1713 | no response |
| SEMEAL       | <i>Semecarpus albescens</i>      | Anacardiaceae             | 0.9653    | -1.1274 | negative    |
| NEPHHY       | <i>Nephelium hypoleucum</i>      | Sapindaceae               | -3.2395   | -1.1147 | no response |
| DIOSVA       | <i>Diospyros variegata</i>       | Ebenaceae                 | -0.6783   | -1.0548 | no response |
| PTERGR       | <i>Pterospermum grandiflorum</i> | Malvaceae                 | 2.6237    | -0.9812 | no response |
| COLOJA       | <i>Colona javanica</i>           | Malvaceae                 | 0.6083    | -0.8115 | negative    |
| ALCHRU       | <i>Alchornea rugosa</i>          | Euphorbiaceae             | -1.8065   | -0.8015 | negative    |
| MURRPA       | <i>Murraya paniculata</i>        | Rutaceae                  | -1.4269   | -0.7283 | no response |
| CROTHU       | <i>Croton hutchinsonianus</i>    | Euphorbiaceae             | -1.1858   | -0.6287 | no response |
| HARPAR       | <i>Harpullia arborea</i>         | Sapindaceae               | -2.3793   | -0.6266 | no response |
| DRYPHO       | <i>Drypetes hoaensis</i>         | Putranjivaceae            | -2.1065   | -0.5879 | no response |
| RADEIG       | <i>Radermachera ignea</i>        | Bignoniaceae              | 0.4832    | -0.5639 | no response |
| ILEXUM       | <i>Ilex umbellulata</i>          | Aquifoliaceae             | -1.6515   | -0.4797 | no response |
| POLYVI       | <i>Polyalthia viridis</i>        | Annonaceae                | 1.5469    | -0.4770 | negative    |
| POLYSU       | <i>Polyalthia suberosa</i>       | Annonaceae                | 1.4673    | -0.3993 | no response |
| SYZYRI       | <i>Syzygium ripicola</i>         | Myrtaceae                 | -0.3268   | -0.3251 | no response |
| APHAPO       | <i>Aphanamixis polystachya</i>   | Meliaceae                 | -0.1794   | -0.2050 | no response |
| MICRPA       | <i>Microcos paniculata</i>       | Malvaceae                 | -0.1218   | -0.1765 | no response |
| SAPIIN       | <i>Sapium insigne</i>            | Euphorbiaceae             | 0.7339    | -0.0507 | negative    |
| POLYCE       | <i>Polyalthia cerasoides</i>     | Annonaceae                | -0.6389   | -0.0260 | no response |
| VITEPE       | <i>Vitex peduncularis</i>        | Lamiaceae                 | -0.3107   | 0.0652  | no response |
| DALBCA       | <i>Dalbergia cana</i>            | Fabaceae-papilionoideae   | -0.8080   | 0.1247  | no response |
| CRATMA       | <i>Crateva magna</i>             | Capparaceae               | -2.0599   | 0.2099  | no response |
| STERCO       | <i>Stereospermum colais</i>      | Bignoniaceae              | -3.3528   | 0.2310  | no response |
| FERNAD       | <i>Fernandoa adenophylla</i>     | Bignoniaceae              | 0.3991    | 0.4406  | no response |
| LAGECA       | <i>Lagerstroemia calyculata</i>  | Lythraceae                | -1.8689   | 0.4749  | no response |
| MARKST       | <i>Markhamia stipulata</i>       | Bignoniaceae              | -1.2972   | 0.6132  | no response |
| TREWNU       | <i>Trewia nudiflora</i>          | Euphorbiaceae             | -0.5942   | 0.6412  | no response |
| DALBCO       | <i>Dalbergia cochinchinensis</i> | Fabaceae-papilionoideae   | -2.4678   | 0.6441  | no response |
| CASSFI       | <i>Cassia fistula</i>            | Fabaceae-caesalpinioideae | -0.6936   | 0.6878  | no response |

**Table S1** (cont.)

| Species code | Species                        | Family                    | Intercept | Slope  | Response    |
|--------------|--------------------------------|---------------------------|-----------|--------|-------------|
| ACROPE       | <i>Acronychia pedunculata</i>  | Rutaceae                  | -1.2030   | 0.6886 | no response |
| LAGEBA       | <i>Lagerstroemia balansae</i>  | Lythraceae                | -2.6766   | 0.8284 | no response |
| LAGETO       | <i>Lagerstroemia tomentosa</i> | Lythraceae                | 1.4434    | 0.8418 | no response |
| STERHY       | <i>Sterculia hypochra</i>      | Malvaceae                 | -1.9671   | 1.1754 | no response |
| GARUPI       | <i>Garuga pinnata</i>          | Burseraceae               | -1.8101   | 1.1783 | no response |
| CROTRO       | <i>Croton roxburghii</i>       | Euphorbiaceae             | 3.8152    | 1.2681 | positive    |
| ALBILU       | <i>Albizia lucidior</i>        | Fabaceae-mimosoideae      | -2.1937   | 1.2728 | no response |
| ALANCH       | <i>Alangium chinense</i>       | Cornaceae                 | 0.3800    | 1.3942 | no response |
| SAPIRA       | <i>Sapindus rarak</i>          | Sapindaceae               | -1.2005   | 1.4689 | positive    |
| SENNTI       | <i>Senna timoriensis</i>       | Fabaceae-caesalpinioideae | 1.7456    | 1.6391 | positive    |
| TETRNU       | <i>Tetrameles nudiflora</i>    | Tetramelaceae             | 0.7478    | 1.8218 | no response |
| CORDDI       | <i>Cordia dichotoma</i>        | Boraginaceae              | -2.5000   | 1.9272 | no response |
| MACASI       | <i>Macaranga siamensis</i>     | Euphorbiaceae             | -0.6109   | 2.7576 | no response |

**Table S2** The result of Kruskal-Wallis test of number of recruits per quadrat across areas that experienced fire conditions from 89 species in 50-ha Huai Kha Khaeng Forest Dynamics Plot, Thailand. Asterisks indicate statistically significant difference: n.s. for  $P > 0.05$ ; \* for  $P \leq 0.05$ ; \*\* for  $P \leq 0.01$ ; \*\*\* for  $P \leq 0.001$ ; \*\*\*\* for  $P \leq 0.0001$ .

| Species code | Species                          | P value      | Significance level |
|--------------|----------------------------------|--------------|--------------------|
| AGLASP       | <i>Aglaia spectabilis</i>        | $1.3e^{-05}$ | ****               |
| CINNTA       | <i>Cinnamomum tavoyanum</i>      | $6.9e^{-07}$ | ****               |
| BACCRA       | <i>Baccaurea ramiflora</i>       | $< 2e^{-16}$ | ****               |
| DIPTAL       | <i>Dipterocarpus alatus</i>      | $7.4e^{-12}$ | ****               |
| VATIHA       | <i>Vatica harmandiana</i>        | $< 2e^{-16}$ | ****               |
| ACEROB       | <i>Acer oblongum</i>             | $1.3e^{-05}$ | ****               |
| SYZYSY       | <i>Syzygium syzygioides</i>      | $6.0e^{-08}$ | ****               |
| MISCPE       | <i>Mischocarpus pentapetalus</i> | $1.1e^{-12}$ | ****               |
| XANTFL       | <i>Xanthophyllum flavescens</i>  | $1.1e^{-07}$ | ****               |
| BEILGA       | <i>Beilschmiedia gammieana</i>   | $2.9e^{-07}$ | ****               |
| SACCLI       | <i>Saccopetalum lineatum</i>     | $1.2e^{-09}$ | ****               |
| DYSOGR       | <i>Dysoxylum grande</i>          | $7.2e^{-08}$ | ****               |
| CYATMA       | <i>Cyathocalyx martabanicus</i>  | 0.04209      | *                  |
| PRUNAR       | <i>Prunus arborea</i>            | 0.06454      | ns                 |
| MEMEOV       | <i>Memecylon ovatum</i>          | $8.1e^{-08}$ | ****               |
| ANTIMO       | <i>Antidesma montanum</i>        | 0.11233      | ns                 |
| HARPCU       | <i>Harpullia cupanioides</i>     | 0.11242      | ns                 |
| PHOEPA       | <i>Phoebe paniculata</i>         | $1.9e^{-14}$ | ****               |
| DALBOL       | <i>Dalbergia oliveri</i>         | 0.13062      | ns                 |
| MITRTH       | <i>Mitrephora thorelii</i>       | $9.8e^{-05}$ | ****               |
| NEOLOB       | <i>Neolitsea obtusifolia</i>     | $< 2e^{-16}$ | ****               |
| DIOSWI       | <i>Diospyros winitii</i>         | $1.3e^{-10}$ | ****               |
| MEMEPL       | <i>Memecylon plebejum</i>        | $2.9e^{-08}$ | ****               |
| OROPPO       | <i>Orophea polycarpa</i>         | $4.7e^{-12}$ | ****               |
| PRISTE       | <i>Prismatomeris tetrandra</i>   | $< 2e^{-16}$ | ****               |
| GARCSP       | <i>Garcinia speciosa</i>         | 0.25105      | ns                 |
| ARYTLI       | <i>Arytera littoralis</i>        | $6.4e^{-08}$ | ****               |
| ANISCO       | <i>Anisoptera costata</i>        | 0.09269      | ns                 |
| MALLPH       | <i>Mallotus philippensis</i>     | $6.4e^{-13}$ | ****               |
| DIOSFE       | <i>Diospyros ferrea</i>          | 0.00090      | ***                |
| DIMOLO       | <i>Dimocarpus longan</i>         | $3.1e^{-15}$ | ****               |
| GLUTOB       | <i>Gluta obovata</i>             | $4.0e^{-10}$ | ****               |
| FAGEFA       | <i>Fagerlindia faciculata</i>    | 0.01948      | *                  |
| ARTOGO       | <i>Artocarpus gomezianus</i>     | 0.01042      | *                  |
| AGLAOD       | <i>Aglaia odorata</i>            | $4.9e^{-06}$ | ****               |
| LAGEVI       | <i>Lagerstroemia villosa</i>     | 0.09405      | ns                 |

Table S2 (cont.)

| Species code | Species                          | P value      | Significance level |
|--------------|----------------------------------|--------------|--------------------|
| ARDIPO       | <i>Ardisia polycephala</i>       | $< 2e^{-16}$ | ****               |
| SYZYCU       | <i>Syzygium cumini</i>           | 0.00076      | ***                |
| PERSXX       | <i>Persea sp.</i>                | $2.4e^{-05}$ | ****               |
| CHAMMA       | <i>Champereia manillana</i>      | 0.03483      | *                  |
| MANGQU       | <i>Mangifera quadrifida</i>      | $4.5e^{-05}$ | ****               |
| LEPIRU       | <i>Lepisanthes rubiginosa</i>    | $1.2e^{-05}$ | ****               |
| HOPEOD       | <i>Hopea odorata</i>             | 0.02806      | *                  |
| ALPHVE       | <i>Alphonsea ventricosa</i>      | $1.6e^{-11}$ | ****               |
| SCLEWA       | <i>Scleropyrum wallichianum</i>  | 0.32860      | ns                 |
| CHUKTA       | <i>Chukrasia tabularis</i>       | 0.03607      | *                  |
| XYLOLO       | <i>Xylosma longifolium</i>       | 0.07151      | ns                 |
| SEMEAL       | <i>Semecarpus albescens</i>      | $1.2e^{-05}$ | ****               |
| NEPHHY       | <i>Nephelium hypoleucum</i>      | 0.18751      | ns                 |
| DIOSVA       | <i>Diospyros variegata</i>       | 0.13623      | ns                 |
| PTERGR       | <i>Pterospermum grandiflorum</i> | 0.35558      | ns                 |
| COLOJA       | <i>Colona javanica</i>           | 0.03260      | *                  |
| ALCHRU       | <i>Alchornea rugosa</i>          | 0.03489      | *                  |
| MURRPA       | <i>Murraya paniculata</i>        | 0.34757      | ns                 |
| CROTHU       | <i>Croton hutchinsonianus</i>    | 0.20382      | ns                 |
| HARPAR       | <i>Harpullia arborea</i>         | 0.64396      | ns                 |
| DRYPHO       | <i>Drypetes hoaensis</i>         | 0.63720      | ns                 |
| RADEIG       | <i>Radermachera ignea</i>        | 0.08759      | ns                 |
| ILEXUM       | <i>Ilex umbellulata</i>          | 0.55597      | ns                 |
| POLYVI       | <i>Polyalthia viridis</i>        | $4.5e^{-07}$ | ****               |
| POLYSU       | <i>Polyalthia suberosa</i>       | 0.94235      | ns                 |
| SYZYRI       | <i>Syzygium ripicola</i>         | 0.46138      | ns                 |
| APHAPO       | <i>Aphanamixis polystachya</i>   | 0.43250      | ns                 |
| MICRPA       | <i>Microcos paniculata</i>       | 0.08580      | ns                 |
| SAPIIN       | <i>Sapium insigne</i>            | 0.00194      | **                 |
| POLYCE       | <i>Polyalthia cerasoides</i>     | 0.31625      | ns                 |
| VITEPE       | <i>Vitex peduncularis</i>        | 0.53368      | ns                 |
| DALBCA       | <i>Dalbergia cana</i>            | 0.72091      | ns                 |
| CRATMA       | <i>Crateva magna</i>             | 0.96755      | ns                 |
| STERCO       | <i>Stereospermum colais</i>      | 0.53067      | ns                 |
| FERNAD       | <i>Fernandoa adenophylla</i>     | 0.59967      | ns                 |
| LAGECA       | <i>Lagerstroemia calyculata</i>  | 0.33355      | ns                 |
| MARKST       | <i>Markhamia stipulata</i>       | 0.86085      | ns                 |
| TREWNU       | <i>Trewia nudiflora</i>          | 0.64593      | ns                 |

**Table S2** (cont.)

| Species code | Species                          | P value             | Significance level |
|--------------|----------------------------------|---------------------|--------------------|
| DALBCO       | <i>Dalbergia cochinchinensis</i> | 0.62154             | ns                 |
| CASSFI       | <i>Cassia fistula</i>            | 0.75128             | ns                 |
| ACROPE       | <i>Acronychia pedunculata</i>    | 0.67397             | ns                 |
| LAGEBA       | <i>Lagerstroemia balansae</i>    | 0.62417             | ns                 |
| LAGETO       | <i>Lagerstroemia tomentosa</i>   | 0.33146             | ns                 |
| STERHY       | <i>Sterculia hypochra</i>        | 0.08902             | ns                 |
| GARUPI       | <i>Garuga pinnata</i>            | 0.35210             | ns                 |
| CROTRO       | <i>Croton roxburghii</i>         | 9.1e <sup>-09</sup> | ****               |
| ALBILU       | <i>Albizia lucidior</i>          | 0.11531             | ns                 |
| ALANCH       | <i>Alangium chinense</i>         | 0.06778             | ns                 |
| SAPIRA       | <i>Sapindus rarak</i>            | 0.01248             | *                  |
| SENNTI       | <i>Senna timoriensis</i>         | 7.2e <sup>-10</sup> | ****               |
| TETRNU       | <i>Tetrameles nudiflora</i>      | 0.15241             | ns                 |
| CORDDI       | <i>Cordia dichotoma</i>          | 0.06433             | ns                 |
| MACASI       | <i>Macaranga siamensis</i>       | 0.05409             | ns                 |

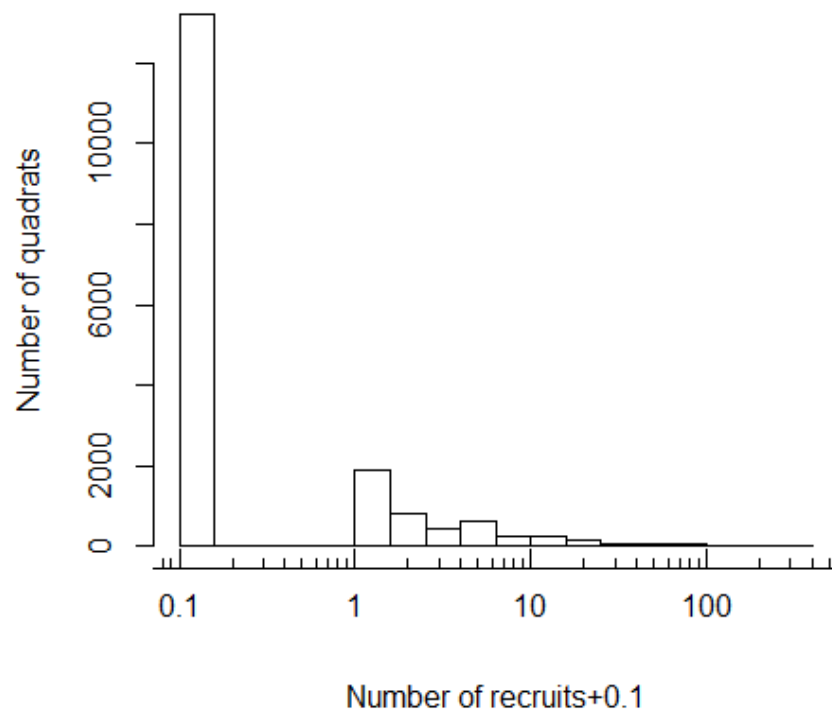

**Figure S1.** Histogram of number of recruits in each species per 50 x 50 m quadrat for 89 tree species in 50-ha Huai Kha Khaeng Forest Dynamics Plot, Thailand. Histogram represents in log10 scale.

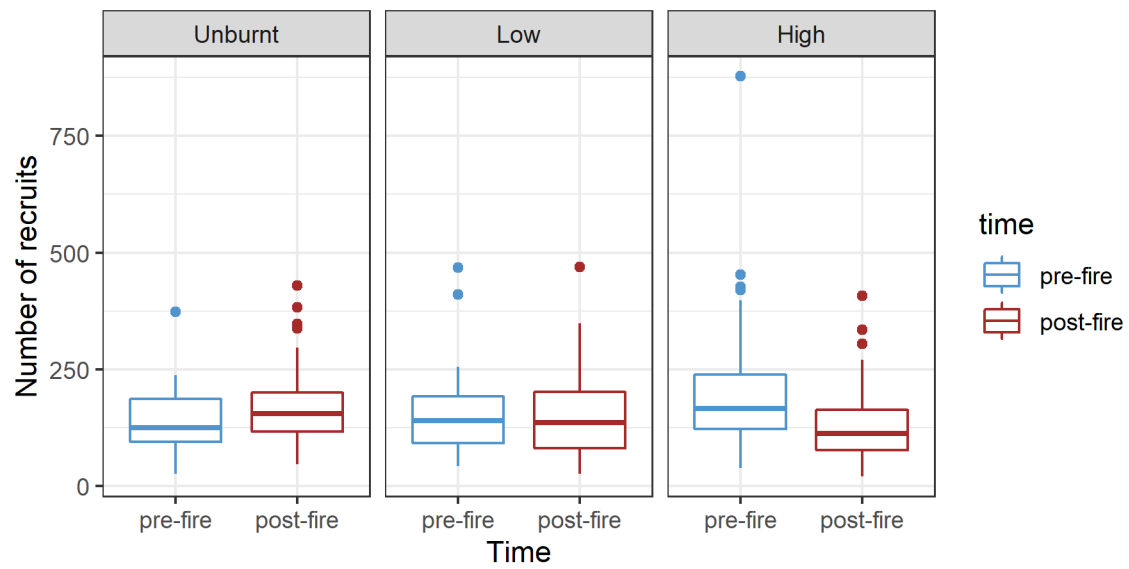

**Figure S2.** Boxplot of number of recruits per quadrat which according to areas in relation to fire-intensity, between pre-fire condition and post-fire condition in Huai Kha Khaeng Forest Dynamics Plot, Thailand. Blue and red display pre-fire condition which refer to 2004 census and post-fire condition which refer to 2009 census, respectively. Dots represent the numbers of recruits in each quadrat. Unburnt, Low, and High are unburnt area, low-intensity burn area, and high-intensity burn area, respectively.



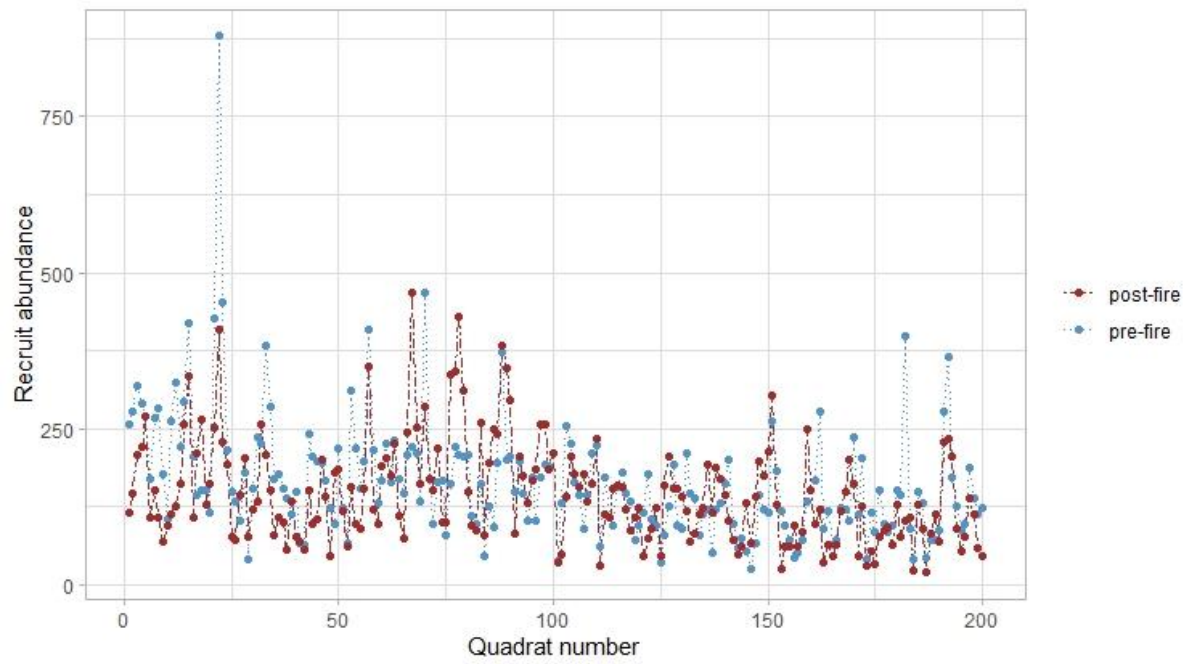

**Figure S3.** Variations in recruit abundances across 200 50 m x 50 m quadrats between pre-fire and post-fire in Huai Kha Khaeng Forest Dynamics Plot, Thailand. Two dash-dotted lines represent variations in recruit abundances. Blue and red dash-dotted lines display pre-fire condition which refer to 2004 census and post-fire condition which refer to 2009 census, respectively. Dots represent the numbers of recruits in each quadrat.

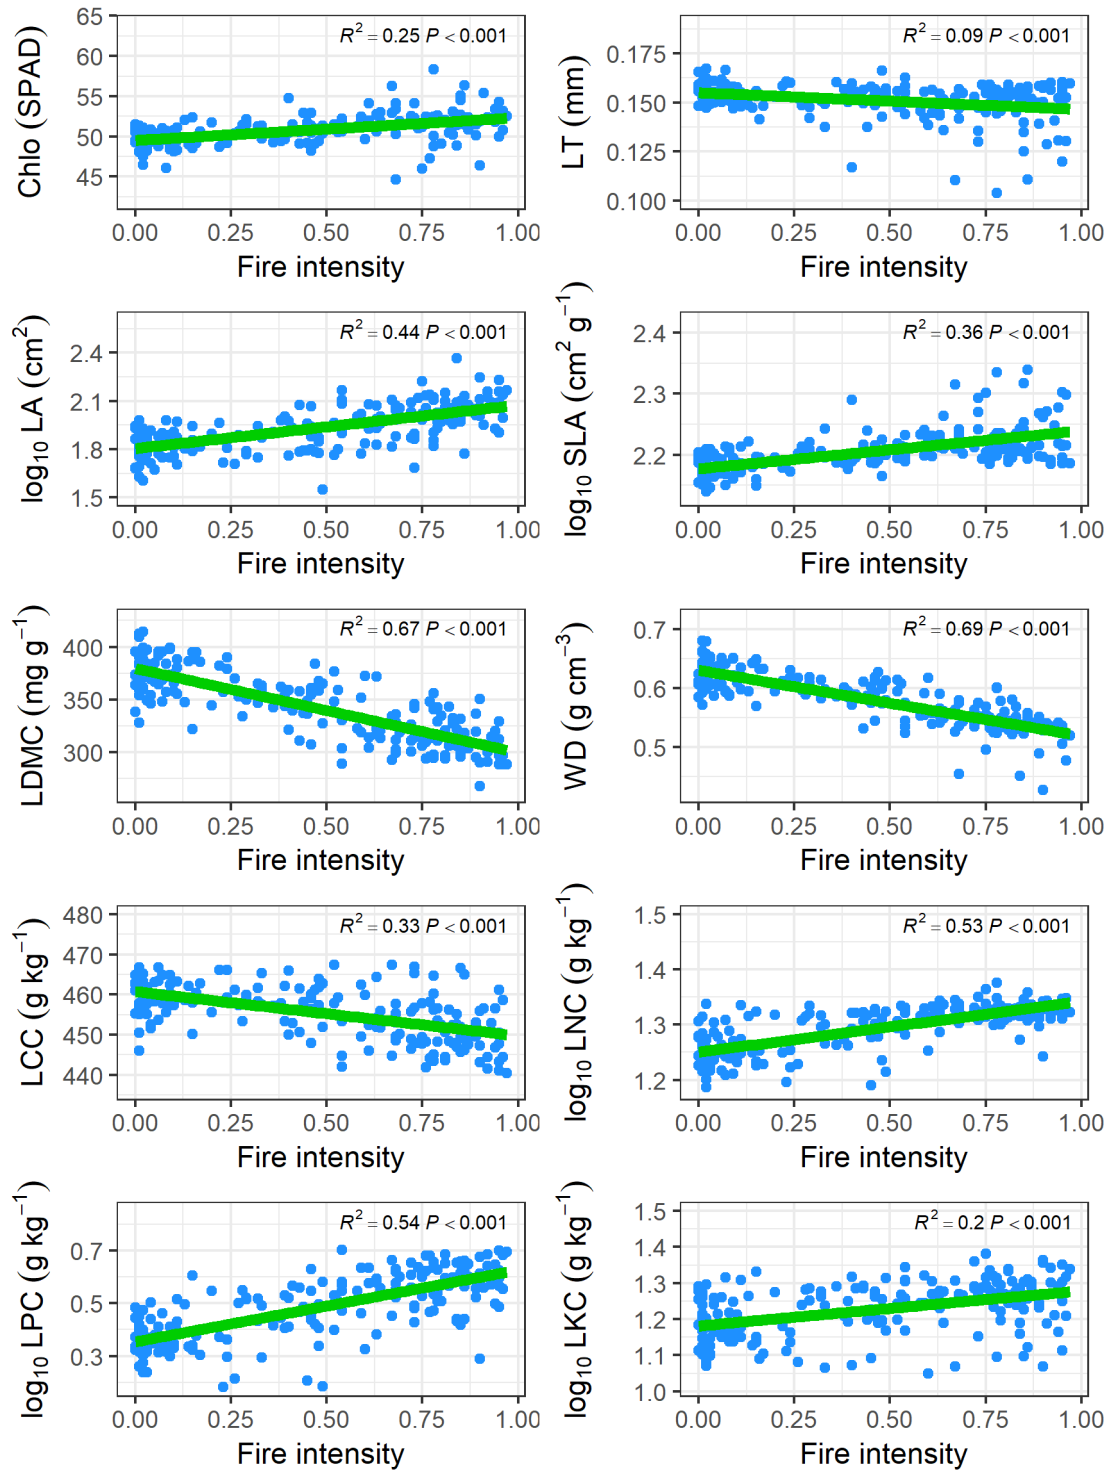

**Figure S4.** Simple linear regression analyses between community-weighted mean (CWM) of functional traits and fire intensity in Huai Kha Khaeng Forest Dynamics Plot, Thailand. Chlo, Chlorophyll content; LT, leaf thickness; LA, leaf area; SLA, specific leaf area; LDMC, leaf dry matter content; WD, wood density; LCC, leaf total carbon concentration; LNC, leaf total nitrogen concentration; and LPC, leaf total phosphorus concentration.

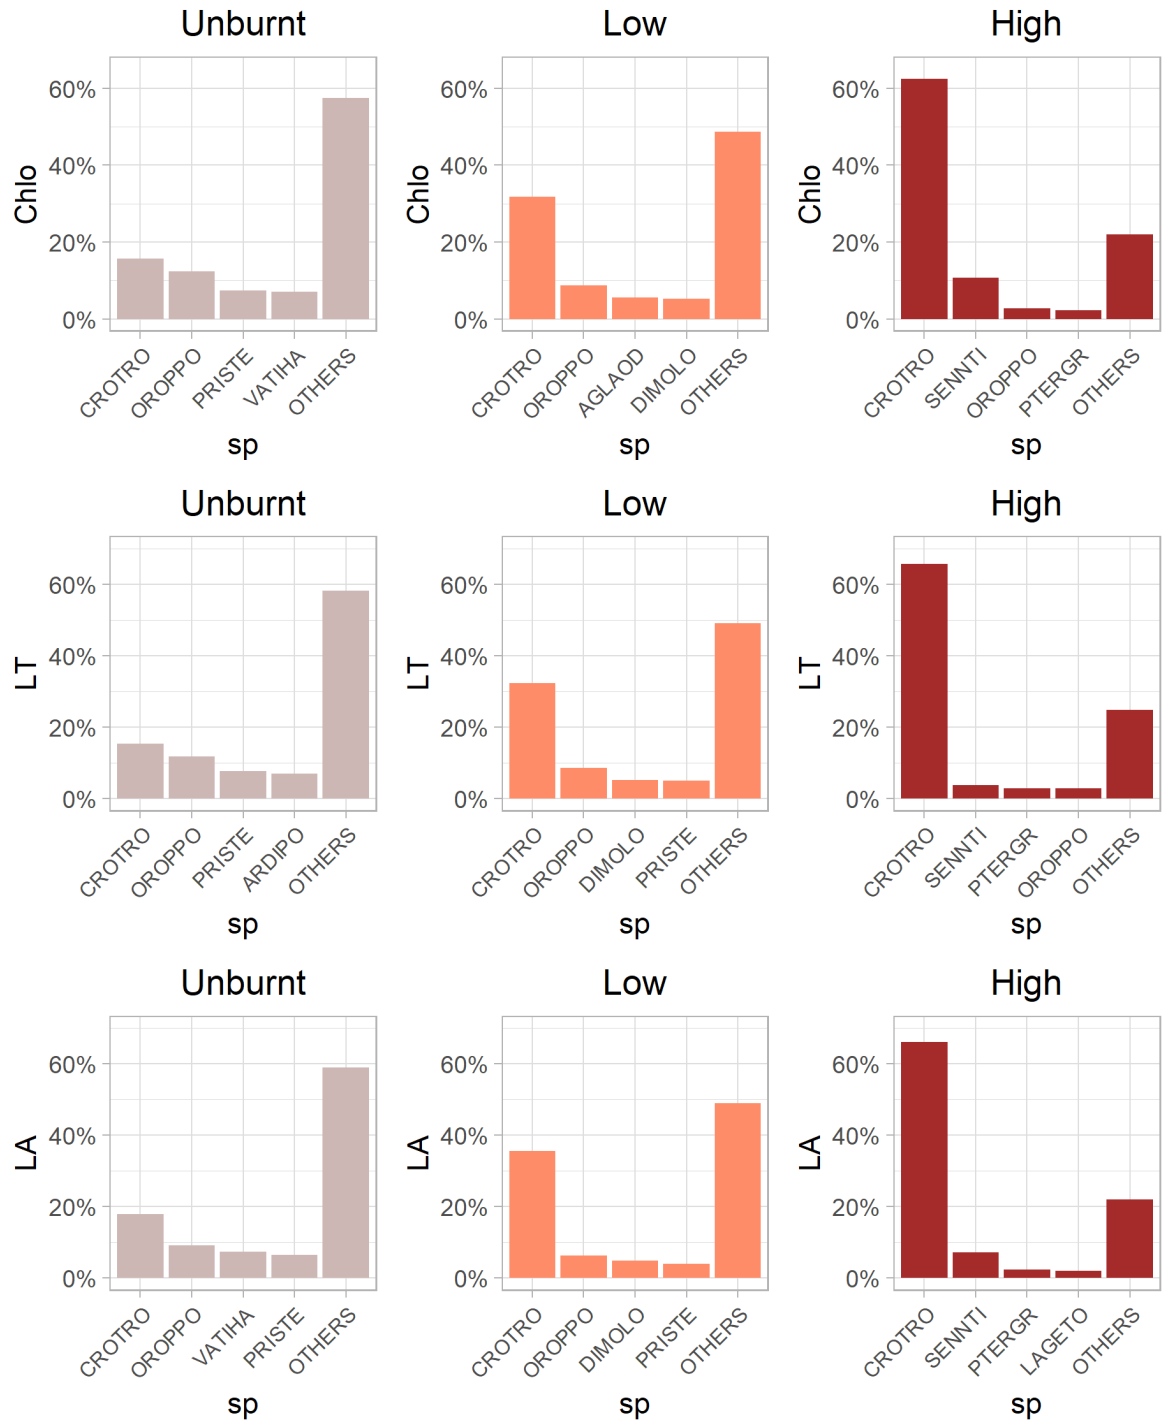

**Figure S5.** Percent of species-specific contribution of recruits to community-weighted mean (CWM) of functional traits in Huai Kha Khaeng Forest Dynamics Plot, Thailand. Chlo, Chlorophyll content; LT, leaf thickness; LA, leaf area; SLA, specific leaf area; LDMC, leaf dry matter content; WD, wood density; LCC, leaf total carbon concentration; LNC, leaf total nitrogen concentration; LPC, leaf total phosphorus concentration; LKC, leaf total potassium concentration. Unburnt, Low, and High are unburnt area, low-intensity burn area, and high-intensity burn area, respectively. Bar charts represent the top four species that contributed most to the community and all

others. Alphabets on the x-axis are the species code (sp) (see Table S1) and OTHERS are other species excluding the top fore species.

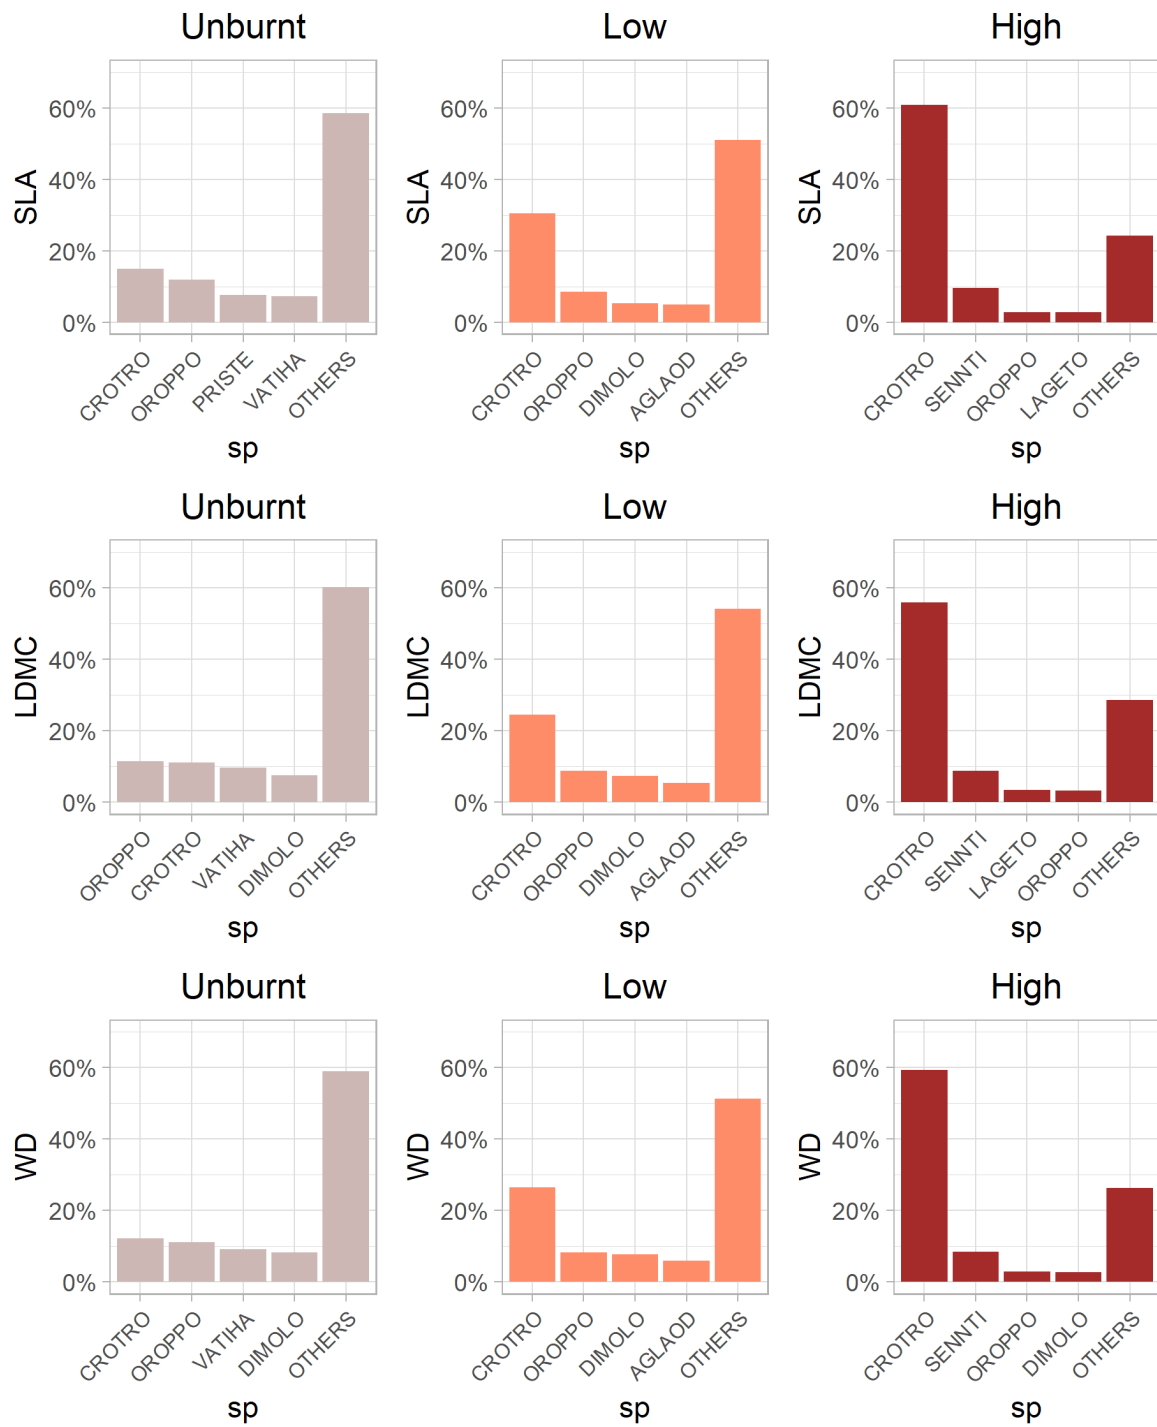

Figure S5. (Cont.)

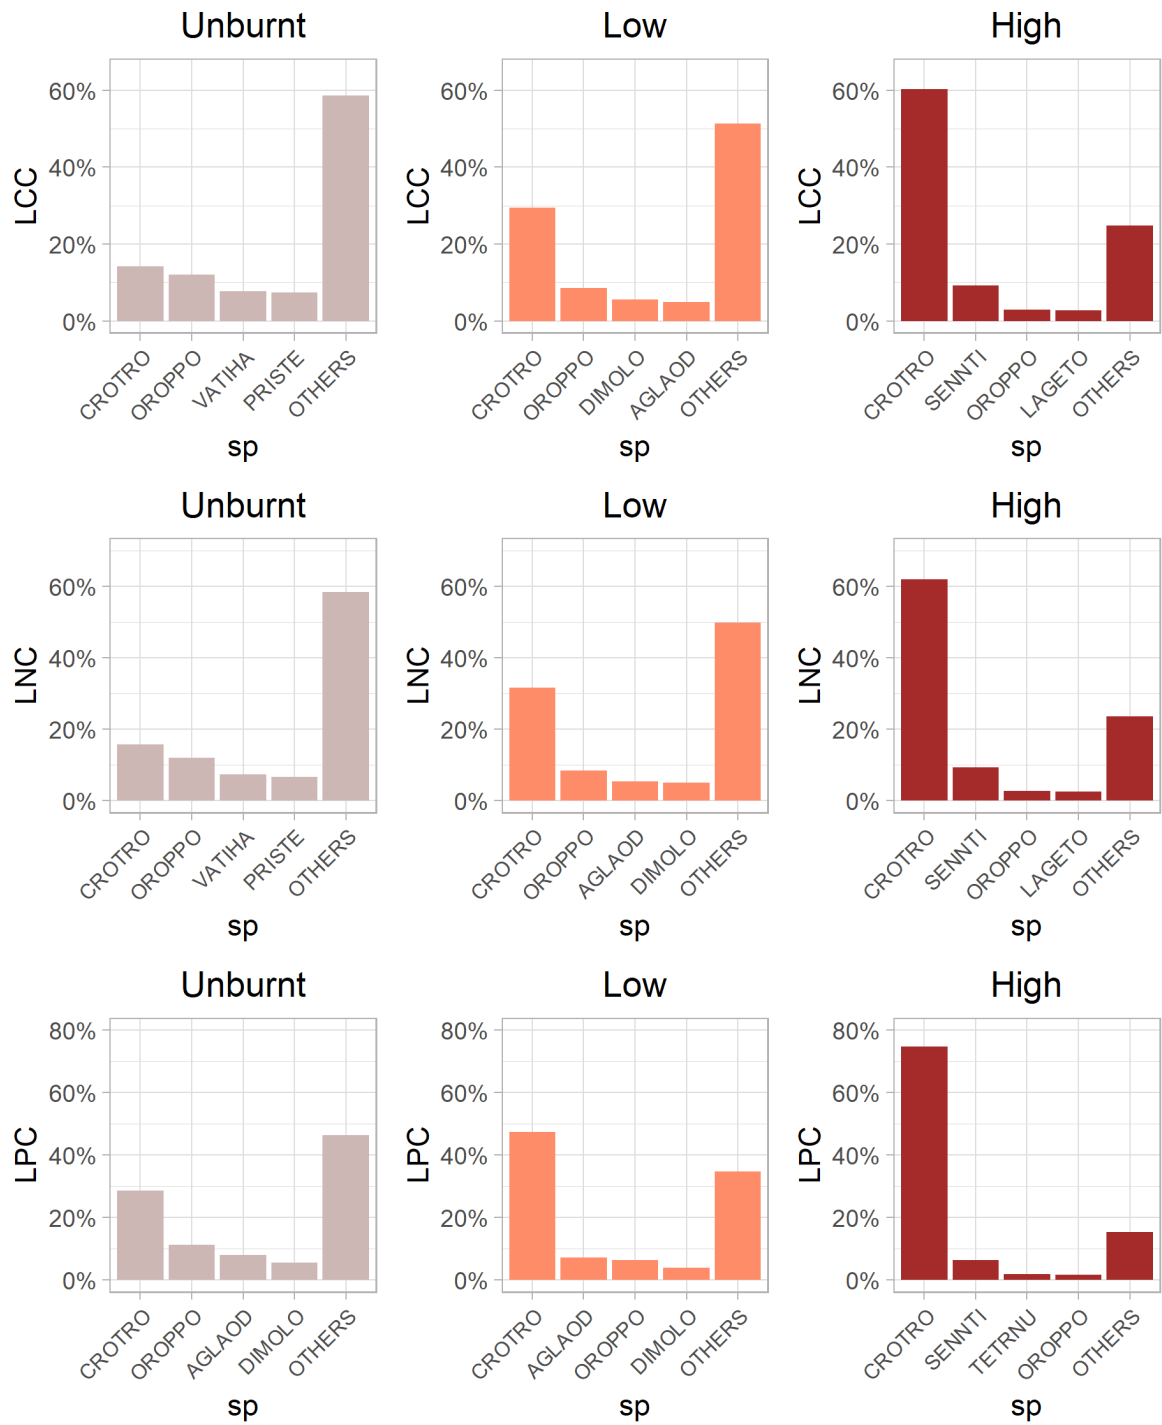

**Figure S5. (Cont.)**

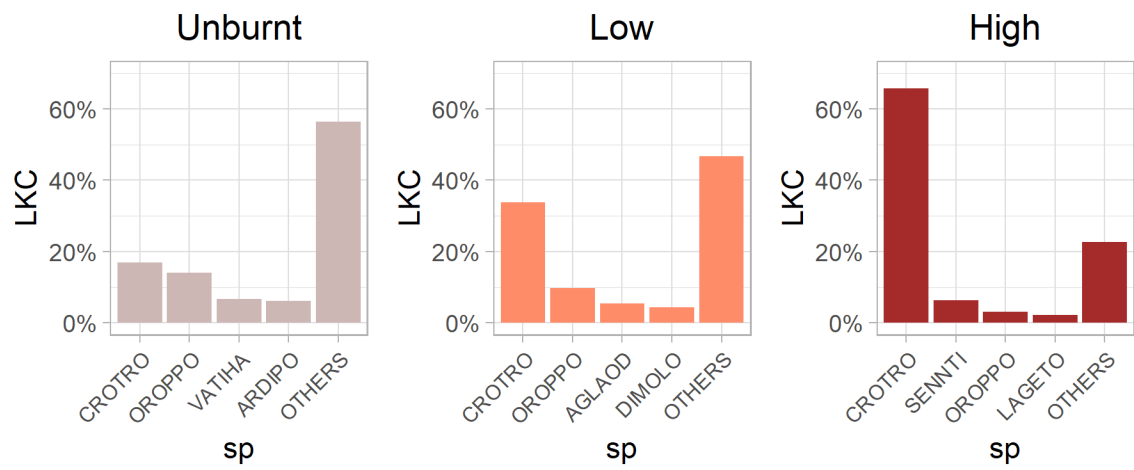

Figure S5. (Cont.)

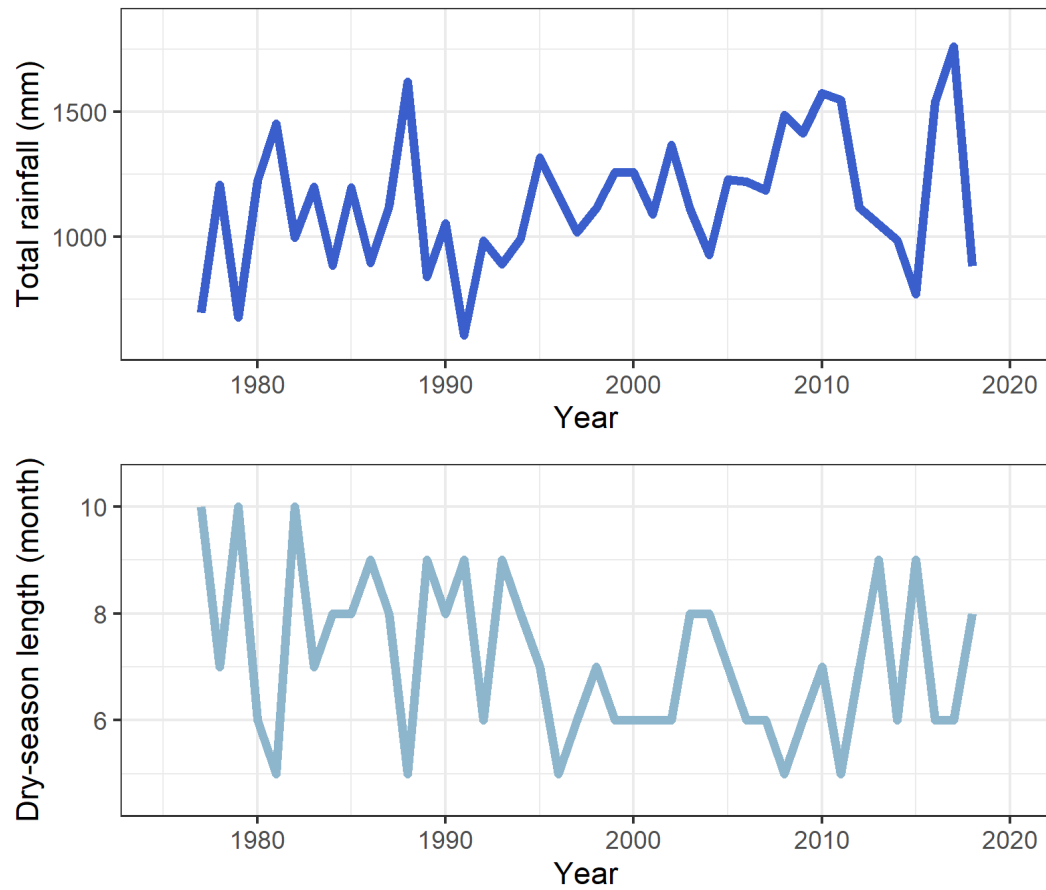

**Figure S6.** Time-series of length of the dry season (bottom) and total annual rainfall (top) from the 41 years (1977-2018). The rainfall data are from Nakhon Sawan Meteorological Station, Thailand. The length of the dry season is calculated by the total number of months where rainfall less than 100 mm.
